# Supplementary material
Source: PubMed Central journal article supplement (PMC4972261)
Supplement: supp_pp.16.00003_PP2016-00003DR2_Supplemental_Material.pdf [file supp_pp.16.00003_PP2016-00003DR2_Supplemental_Material.pdf]

## Supplementary material:

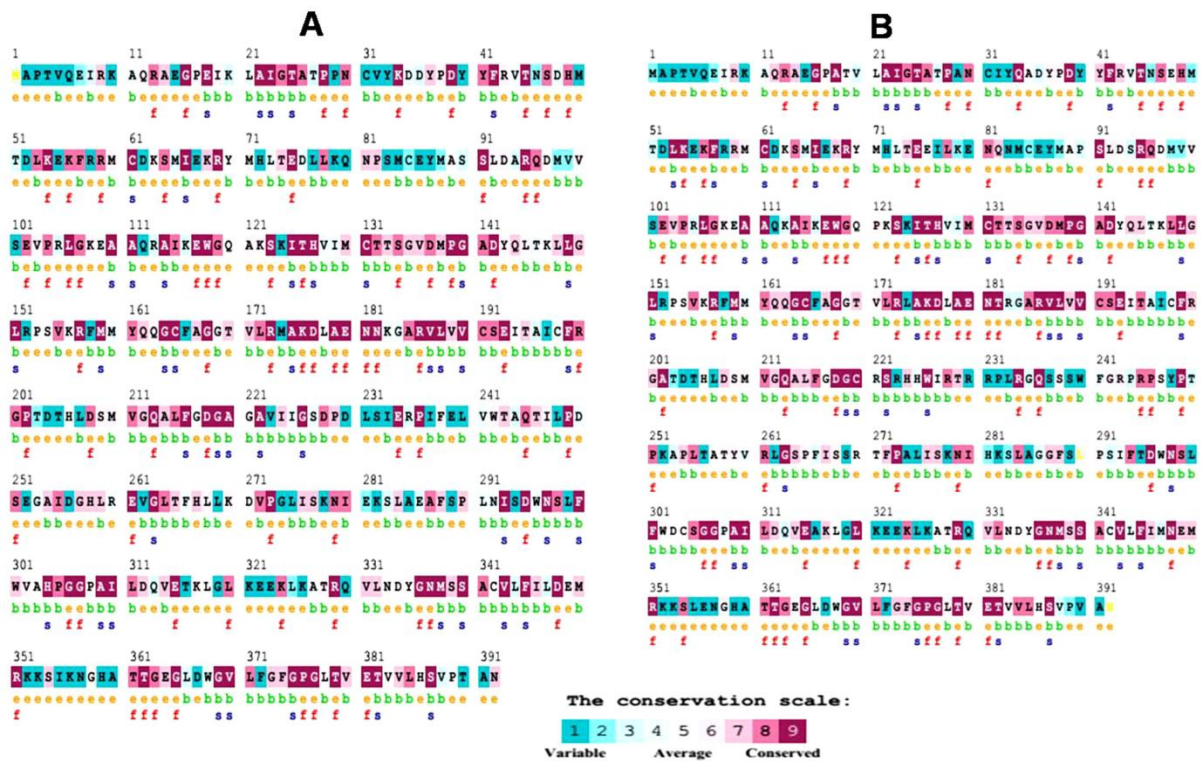

**Supplemental Figure S1: Conserved residue prediction for *ReCHSs*:** Conserved residue analysis of *ReCHS1* (A) and *ReCHS2* (B) were performed using ConSurf and ConSeq web servers. Residue conservation from variable to conserved is shown in blue (1) to purple (9). Abbreviations: e= exposed residue according to the neural-network algorithm; b= buried residue according to the neural-network algorithm; f= predicted functional residue (highly conserved and exposed); s= predicted structural residue (highly conserved and buried); and X= insufficient data, the calculation for this site was performed on less than 10% of the sequences.

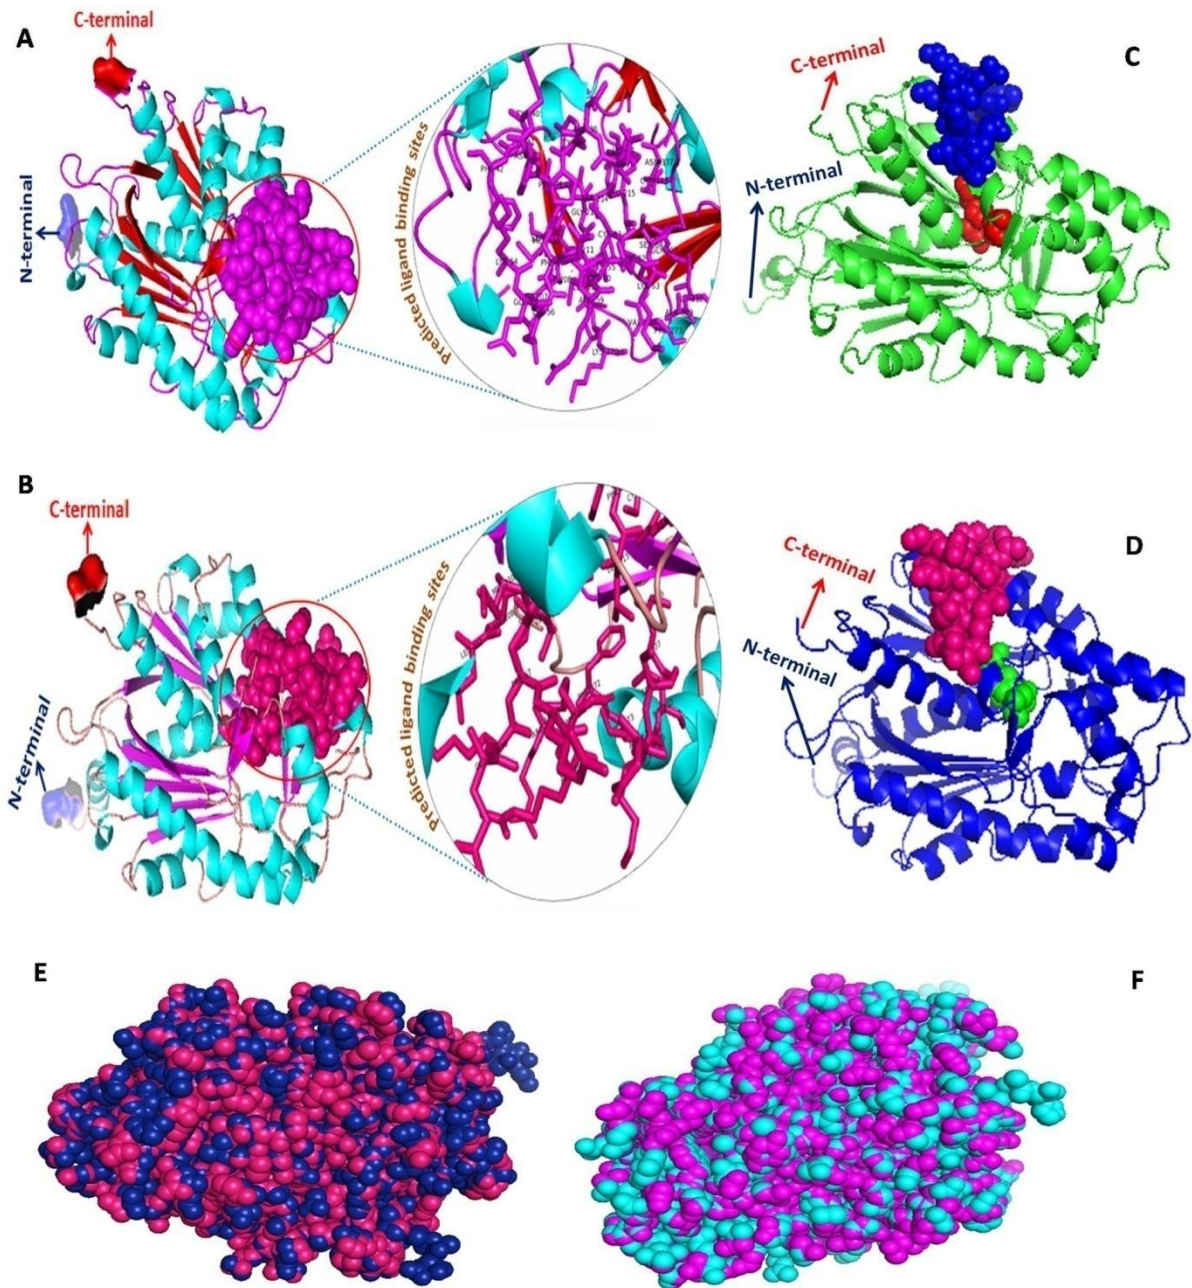

**Supplemental Figure S2: Predicted three-dimensional models and ligand-binding sites of *ReCHSs*:** (A-B); Ribbon model display of the three-dimensional structures of *ReCHS1* (A) and *ReCHS2* (C) as predicted by Phyre<sup>2</sup> web server, using the crystal structure of *Medicago sativa* CHS (PDB code c1cmla) as template. N- and C-terminal domains are shown as blue and red caps, respectively. The ligand binding sites as predicted by 3DLigandSite web server are depicted in the ribbon model (*ReCHS1*, magenta; *ReCHS2*, pink) and also highlighted as an inset. The predicted ligand binding sites for *ReCHS1* were Lys<sup>34</sup>, Asp<sup>35</sup>, Asp<sup>36</sup>, Tyr<sup>37</sup>, Pro<sup>38</sup>, Asp<sup>39</sup>, Tyr<sup>41</sup>, Phe<sup>42</sup>, Lys<sup>54</sup>, Glu<sup>55</sup>, Lys<sup>56</sup>, Phe<sup>57</sup>, Arg<sup>58</sup>, Arg<sup>59</sup>, Met<sup>60</sup>, Cys<sup>61</sup>, Asp<sup>62</sup>, Lys<sup>63</sup>, Ser<sup>64</sup>, Cys<sup>165</sup>, Leu<sup>207</sup>, Asp<sup>208</sup>, Ser<sup>209</sup>, Met<sup>210</sup>, Val<sup>211</sup>, Gly<sup>212</sup>, Gln<sup>213</sup>, Ala<sup>214</sup>, Leu<sup>215</sup>, Phe<sup>216</sup>, Ile<sup>255</sup>, Leu<sup>268</sup>, Lys<sup>270</sup>, Val<sup>272</sup>, Pro<sup>273</sup>, Gly<sup>306</sup>, Gly<sup>307</sup>, Ala<sup>309</sup>, Ile<sup>310</sup>, Asn<sup>337</sup> and for *ReCHS2* the residues include Glu<sup>55</sup>, Lys<sup>56</sup>, Phe<sup>57</sup>, Arg<sup>58</sup>, Arg<sup>59</sup>, Met<sup>60</sup>, Asp<sup>62</sup>, Lys<sup>63</sup>, Ser<sup>64</sup>, Cys<sup>165</sup>, Leu<sup>207</sup>,

Asp<sup>208</sup>, Met<sup>210</sup>, Val<sup>211</sup>, Gly<sup>212</sup>, Leu<sup>215</sup>, Phe<sup>216</sup>, Leu<sup>255</sup>, Ser<sup>268</sup>, Arg<sup>270</sup>, Phe<sup>272</sup>, Pro<sup>273</sup>, Gly<sup>306</sup>, Gly<sup>307</sup>, Ala<sup>309</sup>, Ile<sup>310</sup>, Asn<sup>337</sup>. **(C-D)**; Ribbon display of 3D structures of *Re*CHS1 (C) and *Re*CHS2 (D) as predicted by I-TASSER server, using the crystal structure of *Medicago sativa* CHS (PDB code 1cmla) as template. The highly conserved catalytic triad (Cys-His-Asn) is shown in the central core of the structures (*Re*CHS1, pink; *Re*CHS2, violet). The malonyl CoA binding motifs are also depicted (*Re*CHS1, blue; *Re*CHS2, pink) **(E-F)**; Superimposition of 3D ribbon models of *Re*CHS1 (E, pink) and *Re*CHS2 (F, cyan) with Alfalfa (blue for *Re*CHS1 and violet for *Re*CHS2) using Pairwise Alignment Tool of FATCAT web server.

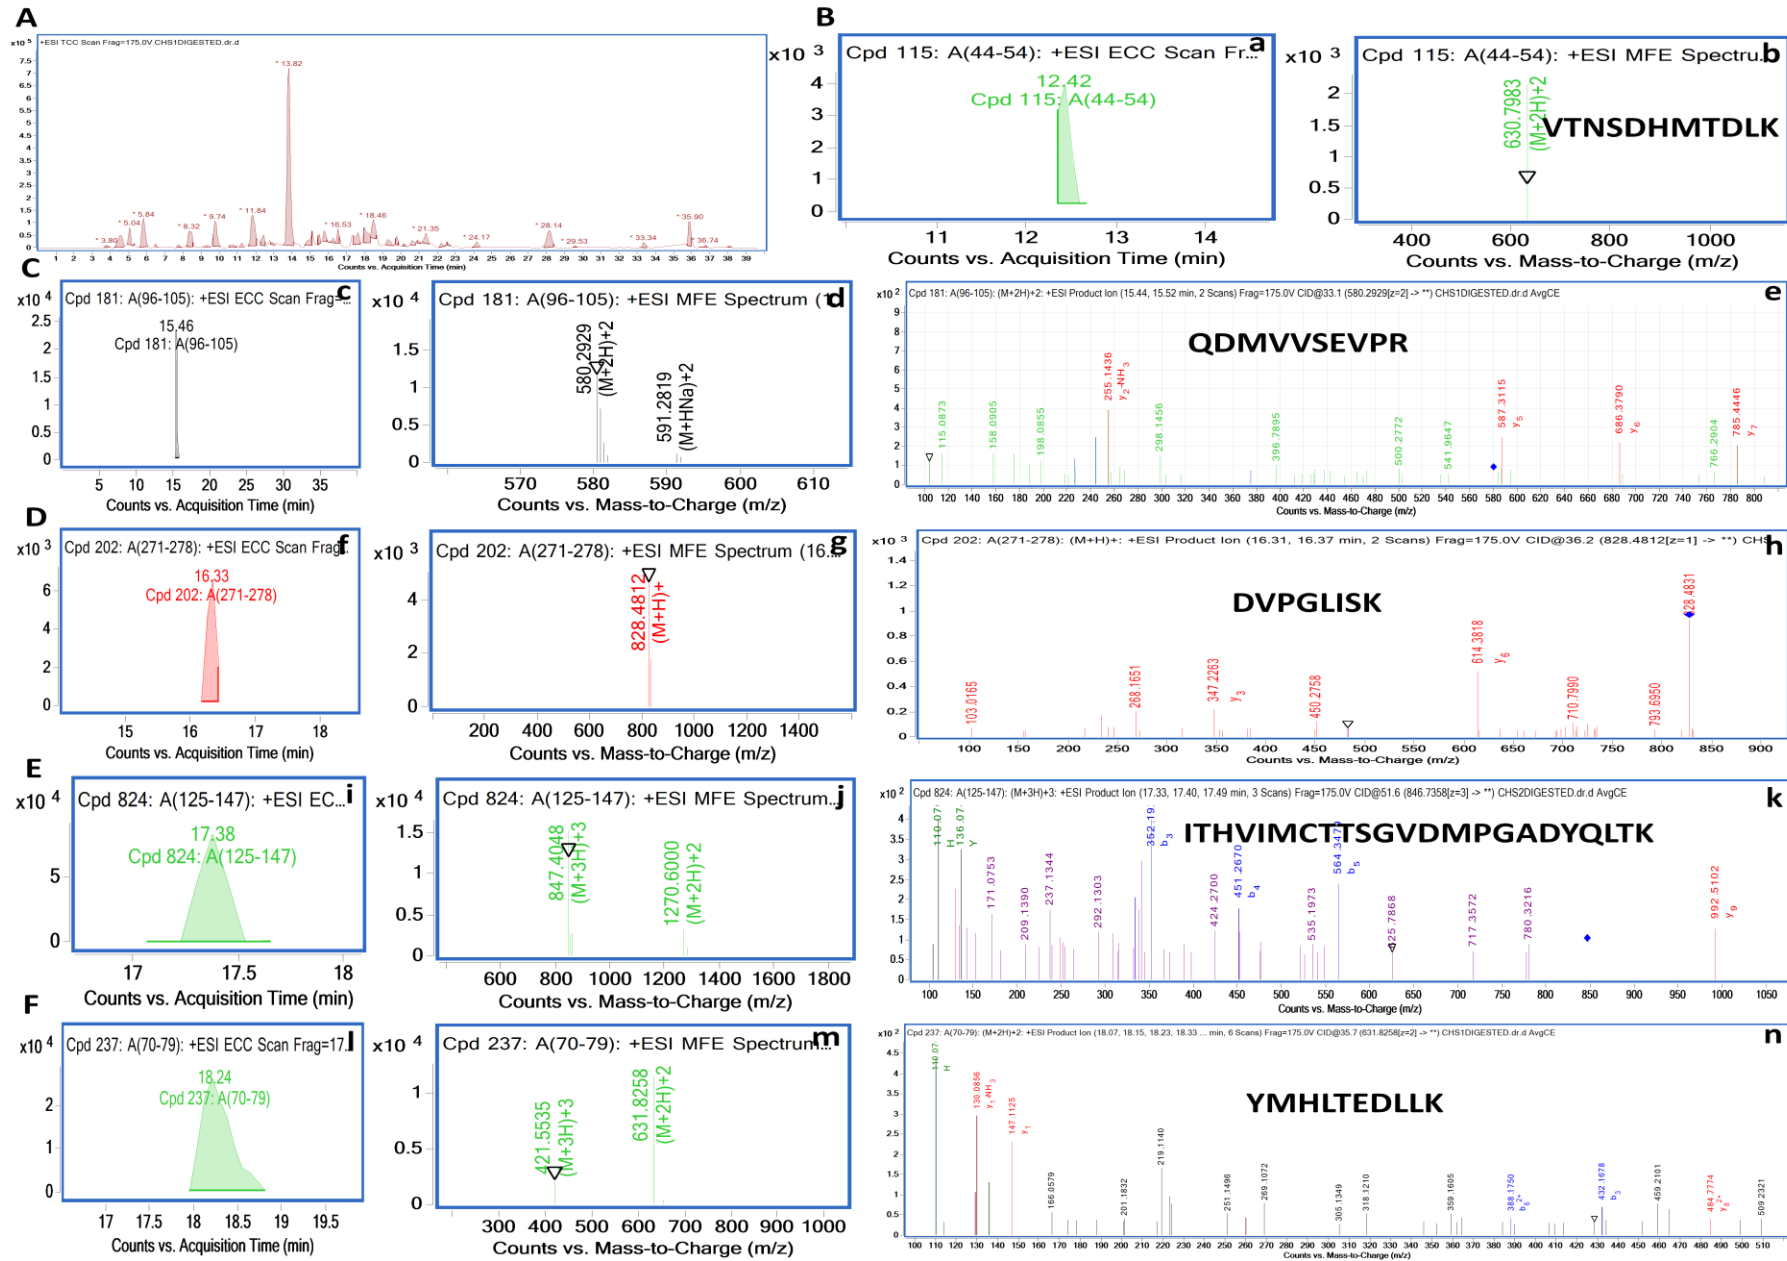

**Supplemental Figure S3: LC-MS/MS of tryptic digest of *ReCHS1*:** (A) Positive ESI TIC spectrum of tryptic digest; (B) The extracted EIC chromatogram of +2 charged 630.7983 ion (a) and its spectrum with molecular ion peak eluting at 12.42 min (b); (C) extracted EIC chromatogram of +2 charged 580.2929 ion (c), its spectrum with molecular ion peak eluting at 15.46 min (d), MS/MS spectrum of 580.2929  $[M+2H]^{+2}$  (e); (D) extracted EIC chromatogram of +1 charged 828.4812 ion (f), its spectrum with molecular ion peak eluting at 16.33 min (g), MS/MS spectrum of 828.4812  $[M+H]^{+1}$  (h); (E) extracted EIC chromatogram of +3 charged 847.4048 ion (i), its spectrum with molecular ion peak eluting at 17.38 min (j), MS/MS spectrum of 847.4048  $[M+2H]^{+3}$  (k); (F) extracted EIC chromatogram of +3 charged 421.5535 ion (l), its spectrum with molecular ion peak eluting at 18.24 min (m), MS/MS spectrum of 421.5535  $[M+2H]^{+3}$  (n). The chromatograms were acquired in the positive ionisation mode and the identified peptides are depicted on the respective tandem mass spectra of precursor ions. The QTOF-MS spectra gave less than 1 ppm error from the theoretical accurate mass ( $m/z$ ) for all the identified peptides (Table I). Fragmentation during MS analysis yielded numerous b- and y- ions, which permitted sequencing of the peptide. The screenshot views of matched b- and y- fragment ions were also generated using the Agilent Mass Hunter BioConfirm version B.06.00 software (not shown).



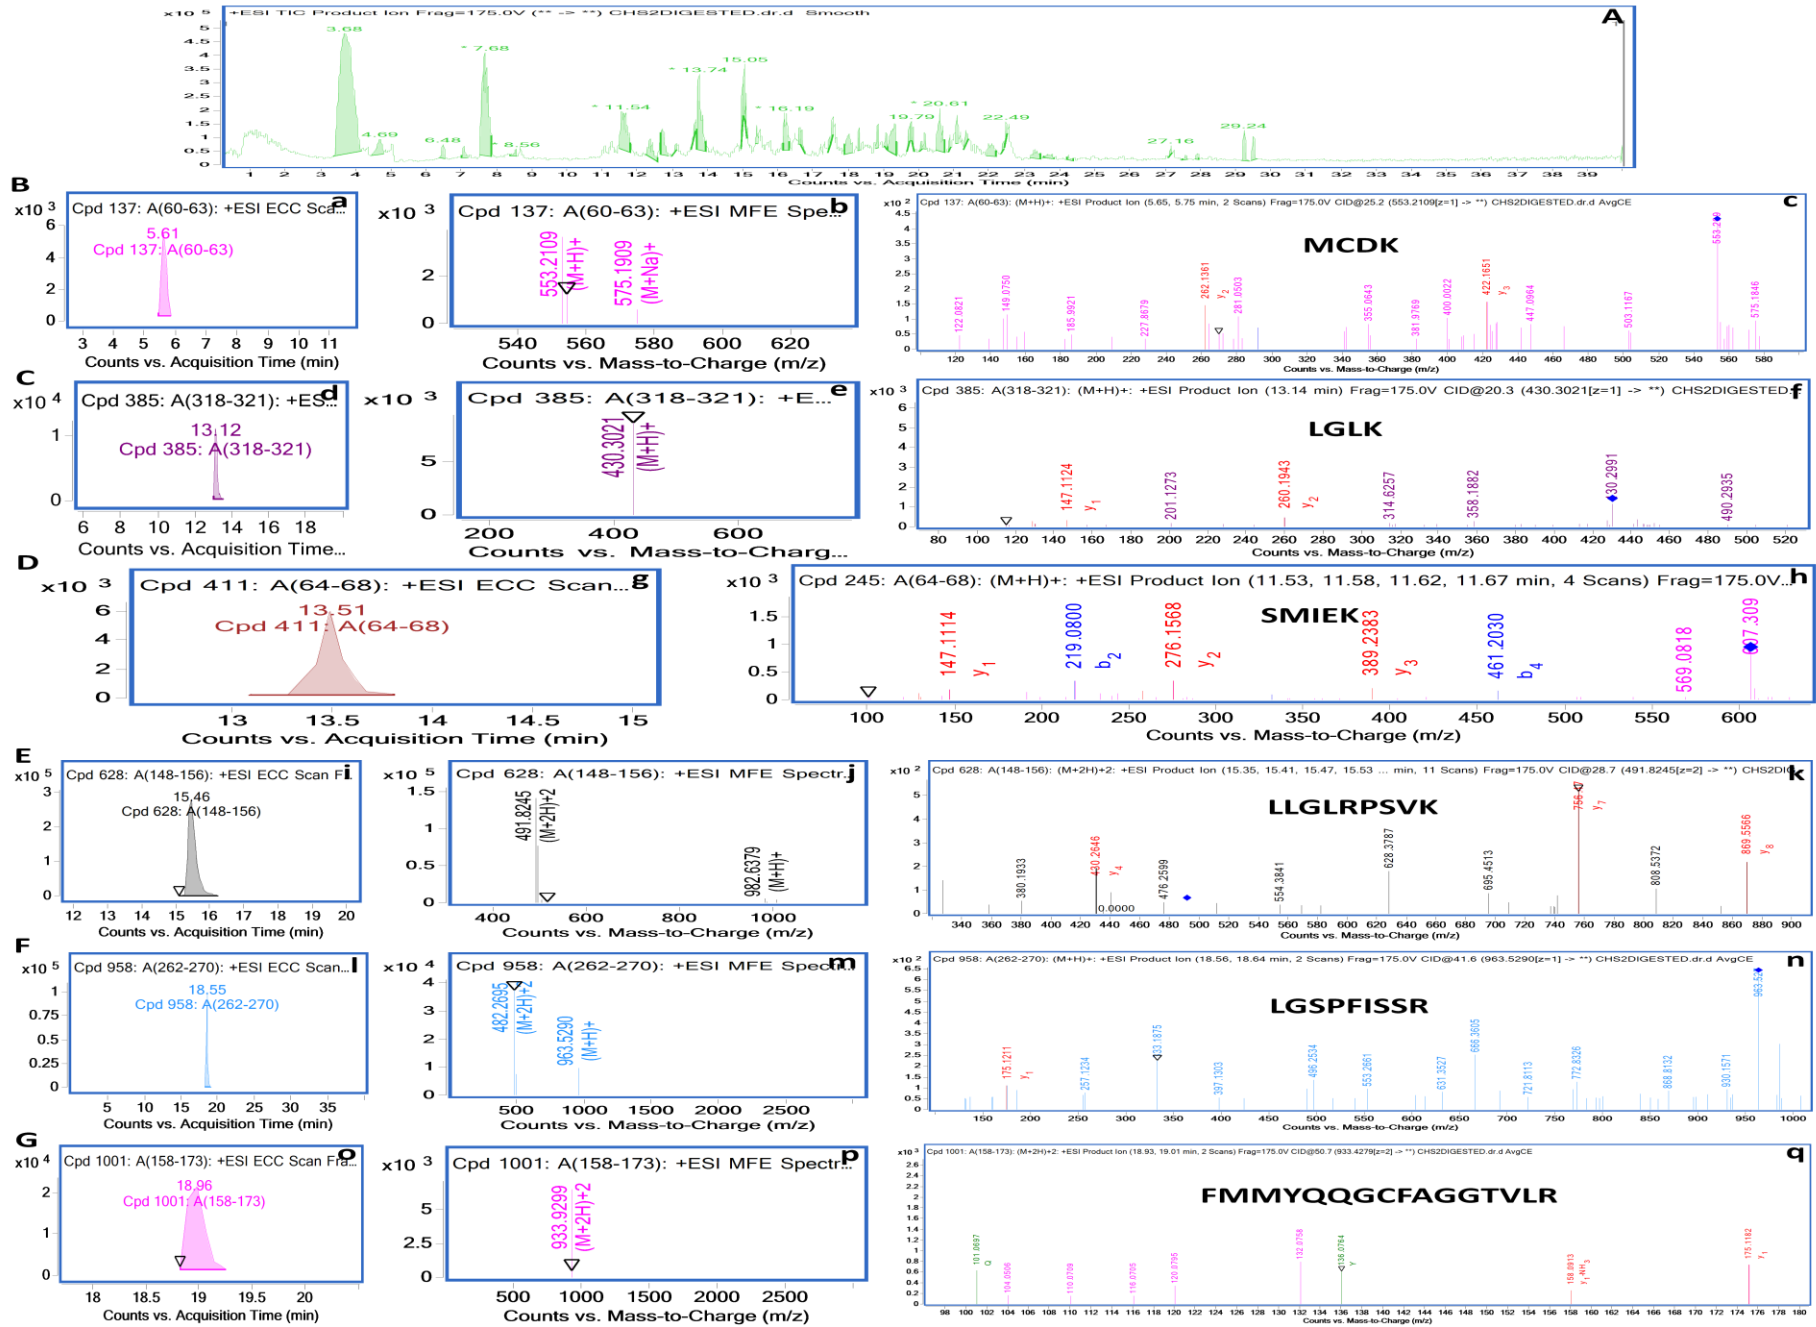

**Supplemental Figure S4: LC-MS/MS of tryptic digest of *ReCHS2*:** (A) Positive ESI TIC spectrum of tryptic digest; (B) The extracted EIC chromatogram of +1 charged 553.2109 ion (a), its spectrum with molecular ion peak eluting at 5.61 min (b), MS/MS spectrum of 553.2109  $[M+H]^+$  (c); (C) extracted EIC chromatogram of +1 charged 430.3021 ion (d), its spectrum with molecular ion peak eluting at 13.12 min (e), MS/MS spectrum of 430.3021  $[M+H]^+$  (f); (D) extracted EIC chromatogram of +1 charged 607.309 ion (g), MS/MS spectrum of 607.309  $[M+H]^+$  (h); (E) extracted EIC chromatogram of +2 charged 491.8245 ion (i), its spectrum with molecular ion peak eluting at 15.46 min (j), MS/MS spectrum of 491.8245  $[M+2H]^{2+}$  (k); (F) extracted EIC chromatogram of +1 charged 963.5290 ion (l), its spectrum with molecular ion peak eluting at 18.55 min (m), MS/MS spectrum of 963.5290  $[M+H]^+$  (n). (G) extracted EIC chromatogram of +2 charged 933.9299 ion (o), its spectrum with molecular ion peak eluting at 18.96 min (p), MS/MS spectrum of 933.9299  $[M+2H]^{2+}$  (q). The chromatograms were acquired in the positive ionisation mode and the identified peptides are depicted on the respective tandem mass spectra of precursor ions. The QTOF-MS spectra gave less than 1 ppm error from the theoretical accurate mass ( $m/z$ ) for all the identified peptides except 963.5290  $[M+H]^+$  ion where ppm error was 5.13 (Table I). Fragmentation during MS analysis yielded numerous b- and y- ions, which permitted sequencing of the peptide. The screenshot views of matched b- and y- fragment ions were also generated using the Agilent Mass Hunter BioConfirm version B.06.00 software (not shown).

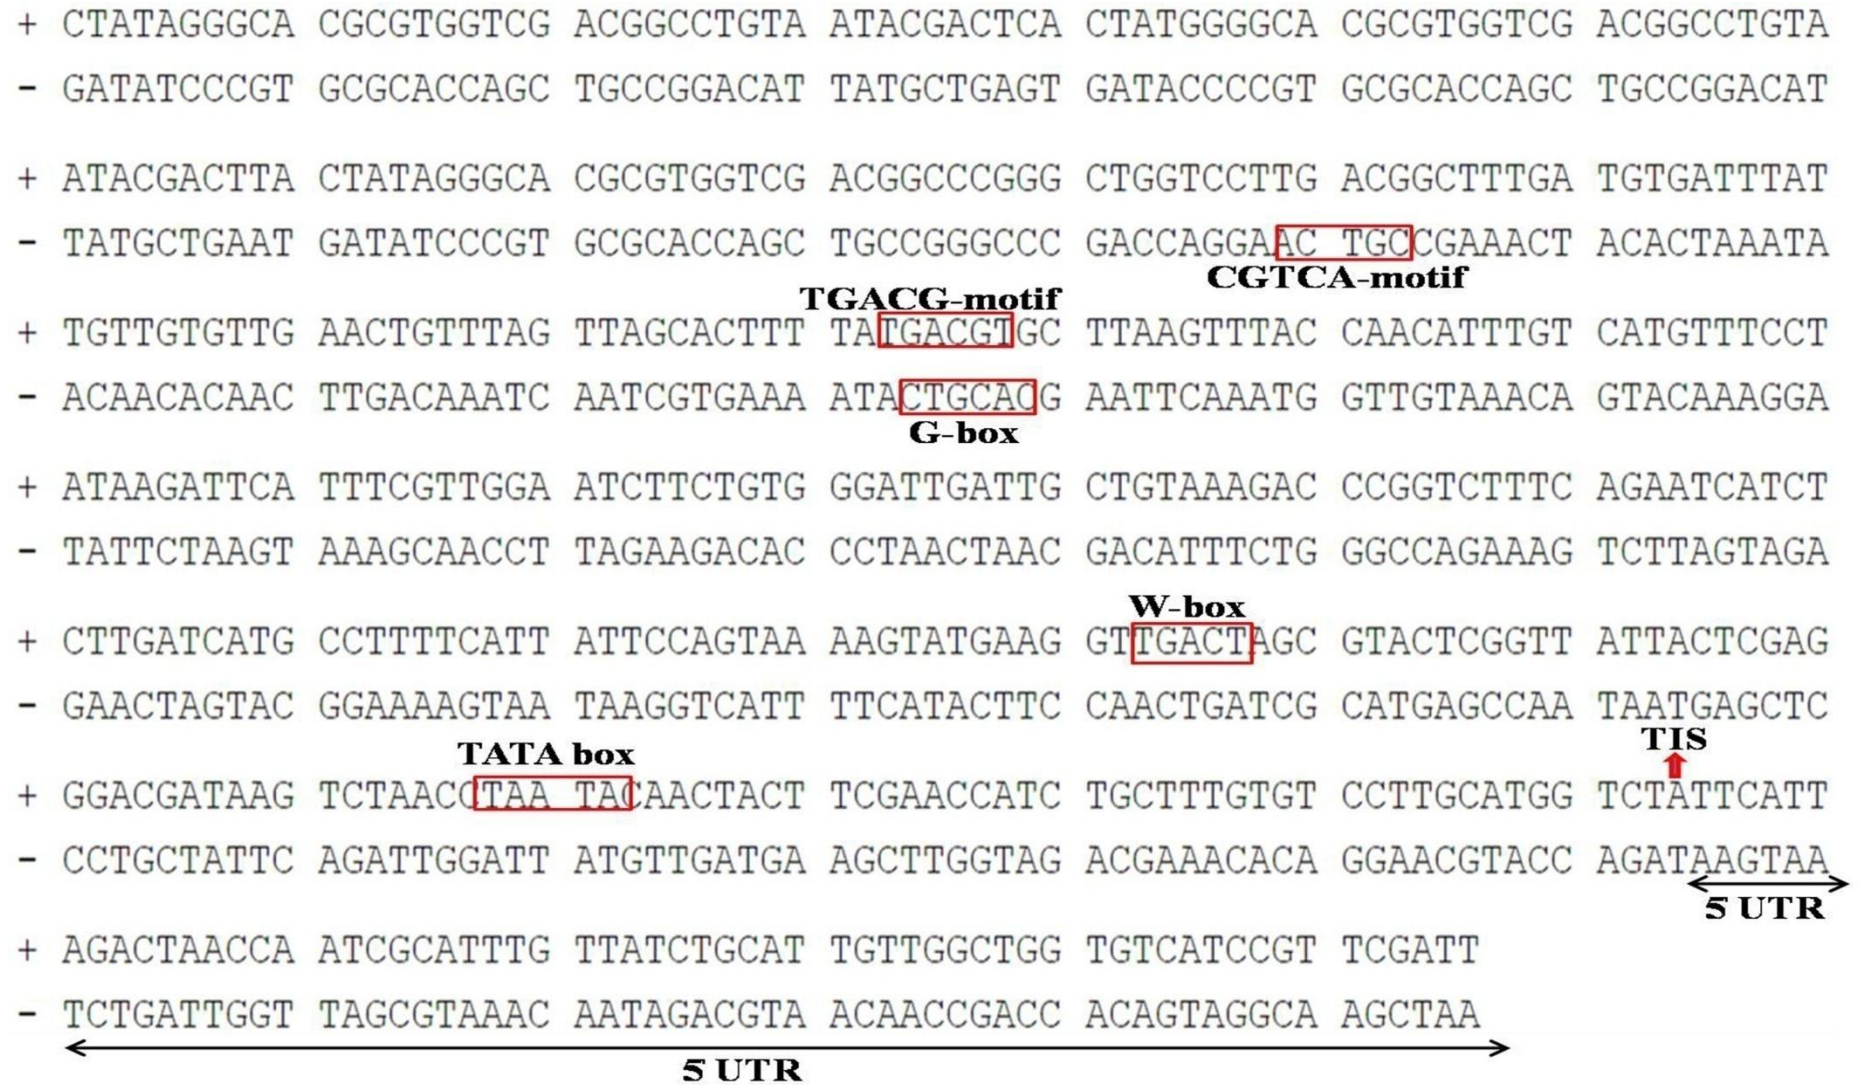

Fig S5 (A)



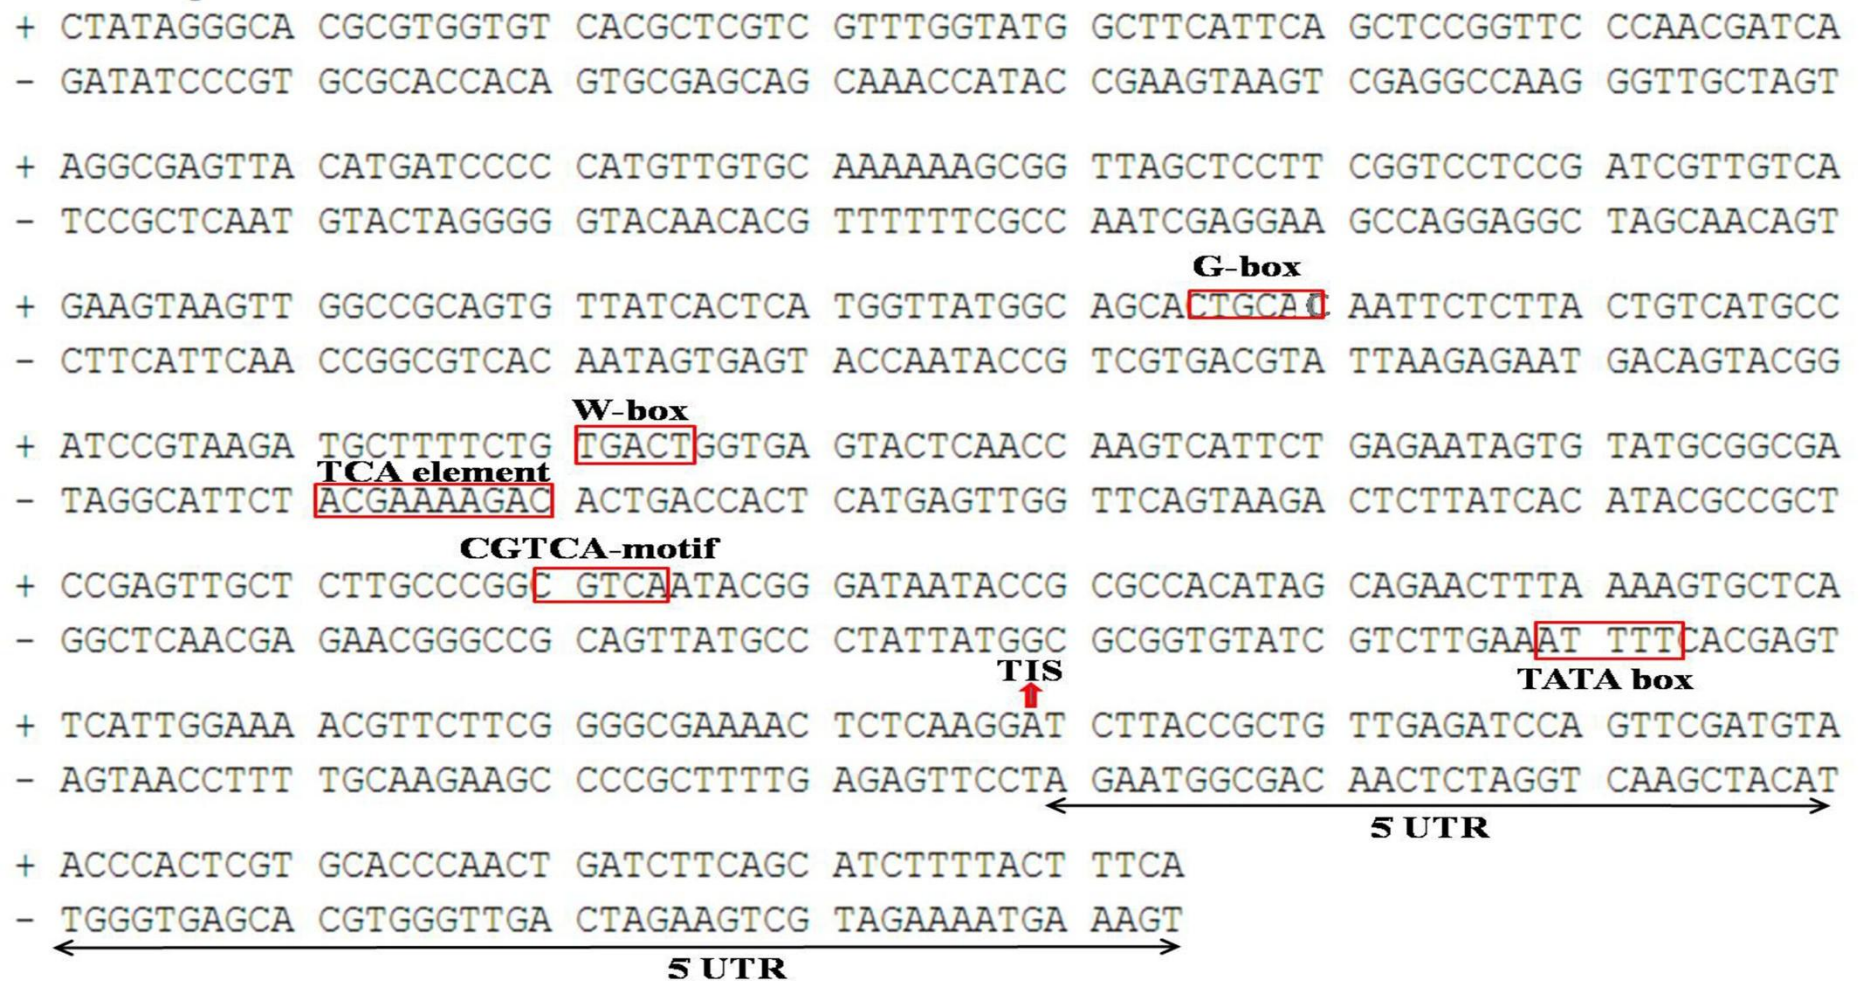

Fig S5 (B)

**Supplemental Figure S5.** Nucleotide sequences of *ReCHS1* (A) and *ReCHS2* (B) gene promoters. The putative core promoter consensus sequences and the motifs with significant similarity to the previously identified *cis*-acting elements are highlighted and the names are given. TIS represent the transcription initiation site. 5' untranslated regions (UTRs) are depicted with an arrow.

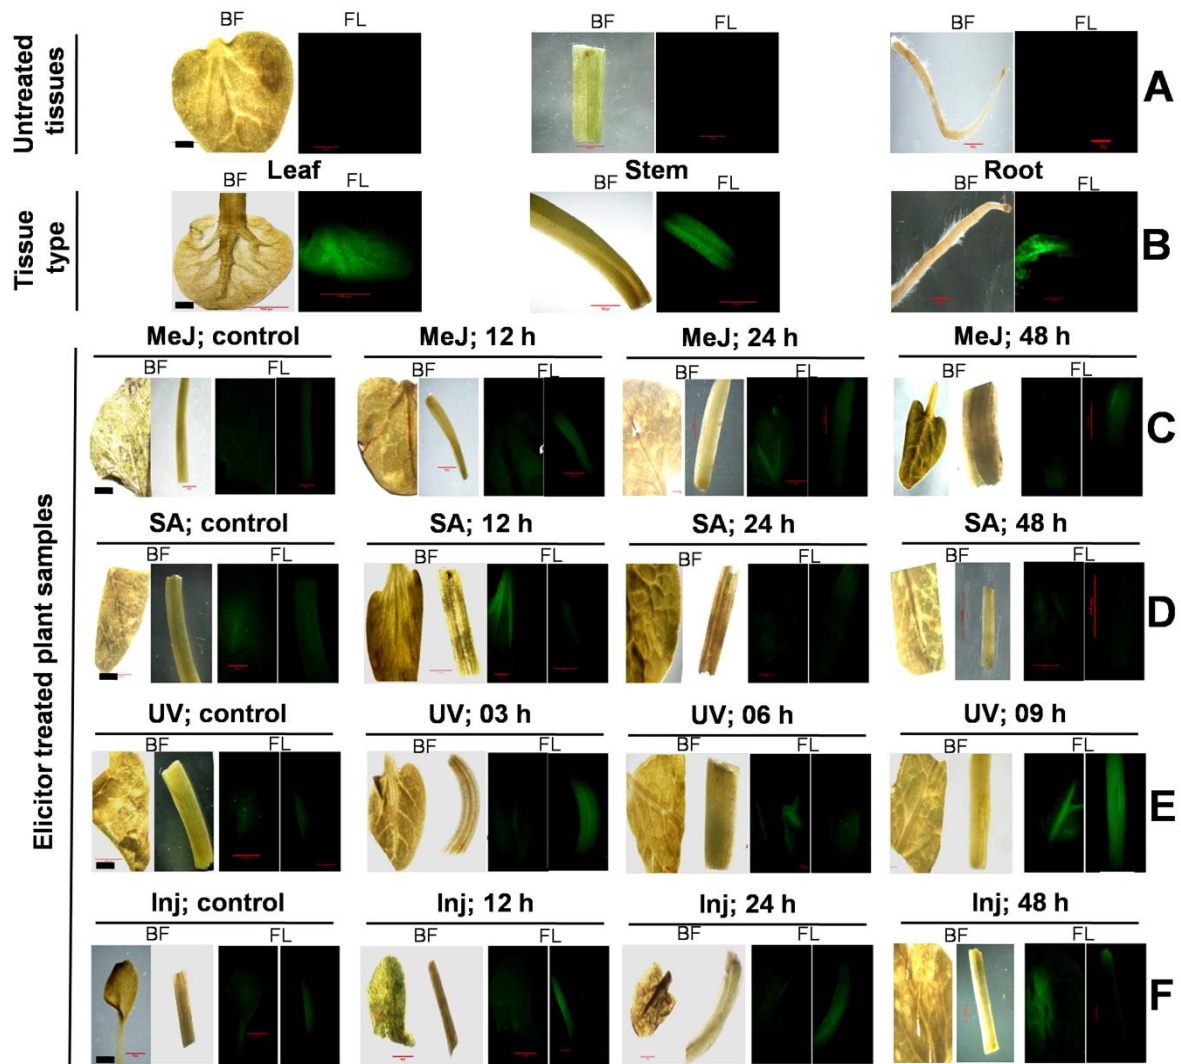

**Supplemental Figure S6: Flavonoid accumulation in different tissues of *R. emodi* as determined by diphenylboric acid-2-aminoethyl ester (DPBA) staining:** (A) Tissue samples without DPBA staining; (B) Relative flavonoid detection in leaf, stem and root tissues of the plant; (C-F) Time course effect of abiotic elicitor treatments on flavonoid accumulation in response to 0.1 mM MeJ (C), 0.1 mM SA (D), UV-B radiation (E) and wounding/injury (F). The elicited tissues were harvested at different time intervals ranging from 12 to 48 h as depicted (except for UV for which incubation periods were 3, 6 and 9 h). Fluorescence of flavonoids is enhanced by diphenylboric acid-2-aminoethyl ester (DPBA). Fluorescence was visualized after DPBA staining with blue light under a stereo microscope (Nikon SMZ1000) equipped with a green fluorescent protein (GFP) filter unit (excitation: 480/40 nm, barrier filter: 535/50 nm). For elicitor treated samples, leaf and intermodal segments (2-3 cm above basal portion) were used for imaging and the pictures were taken both in bright- (BF) and fluorescence- (FL) fields. The leaves were irradiated from the abaxial side and bright field images (BF) were taken for leaf morphology interpretation. All the images were obtained under same conditions and assembled using Adobe Photoshop 6 software (Adobe Systems Inc., USA) software without altering the colour parameters. Bar = 100  $\mu$ m.

**Supplemental Table S1:** Synonymous and non-synonymous mutations of *ReCHSs*

| <b>Sequence name</b>               | <b>S</b> | <b>N</b> | <b>ds</b>    | <b>dn</b>   | <b>ds/dn</b> |
|------------------------------------|----------|----------|--------------|-------------|--------------|
| <i>ReCHS1</i> versus <i>ReCHS2</i> | 267.83   | 911.17   | 0.889 ± 0.10 | 0.195 ± .05 | 4.558        |

\*S mean number of synonymous sites, N mean number of non-synonymous sites, ds mean synonymous substitutions per synonymous site, dn mean non-synonymous substitutions per non-synonymous site

**Supplemental Table S2:** Concentrations of major flavonoid and anthraquinone constituents from different tissues, plant samples from four different geographical locations of North Western Himalayas and elicitor treated tissues of *Rheum emodi*.

| Sample                  | Flavonoid content (% DWB) |              |              | Anthraquinone content (% DWB) |               |              |
|-------------------------|---------------------------|--------------|--------------|-------------------------------|---------------|--------------|
|                         | Kaempferol                | Naringenin   | Quercetin    | Rutin                         | Emodin        | Chrysophanol |
| <b>Leaf</b>             | 0.0236±0.004              | 3.2633±0.53  | 0.216±0.022  | 12.896±0.989                  | 1.873±0.221   | 3.707±0.188  |
| <b>Stem</b>             | 0.0198±0.004              | 3.152±0.46   | 0.0501±0.004 | 5.8372±0.511                  | 0.659±0.158   | 3.338±0.135  |
| <b>Root</b>             | 0.0126±0.003              | 4.671±0.439  | 0.099±0.003  | 5.5802±0.546                  | 0.5646±0.12   | 3.0198±0.137 |
| <b>Bonera</b>           | 0.0145±0.003              | 12.834±0.853 | 1.058±0.047  | 14.305±1.056                  | ***           | ***          |
| <b>Yarikhah</b>         | 0.0703±0.004              | 7.431±0.443  | 0.734±0.058  | 11.603±1.413                  | ***           | ***          |
| <b>Pen se La</b>        | 0.156±0.005               | 13.844±0.903 | 1.431±0.414  | 15.139±1.034                  | ***           | ***          |
| <b>Nyoma</b>            | 0.251±0.01                | 15.266±1.043 | 3.915±0.879  | 17.887±1.114                  | ***           | ***          |
| <b>Control UV-B</b>     | 0.0068±0.001              | 2.806±0.607  | 0.104±0.006  | 8.4012±0.49                   | 0.094±0.007   | 0.278±0.007  |
| <b>UV-3h</b>            | 0.063±0.005               | 3.9862±0.437 | 0.1956±0.005 | 15.254±0.664                  | 0.812±0.041   | 2.7118±0.136 |
| <b>UV-6h</b>            | 0.066±0.005               | 4.564±0.391  | 0.1668±0.011 | 16.705±0.732                  | 0.652±0.034   | 1.228±0.03   |
| <b>UV-9h</b>            | 0.0141±0.004              | 5.0182±0.66  | 0.044±0.006  | 12.715±0.52                   | 0.436±0.007   | 1.719±0.135  |
| <b>Control Wounding</b> | 0.0068±0.001              | 2.806±0.607  | 0.104±0.006  | 7.401±1.443                   | 0.090±0.012   | 0.282±0.021  |
| <b>W-12h</b>            | 0.0831±0.008              | 3.007±0.722  | 0.093±0.007  | 10.305±1.295                  | 0.578±0.403   | 0.991±0.064  |
| <b>W-24h</b>            | 0.056±0.005               | 3.515±0.547  | 0.078±0.006  | 14.794±1.206                  | 0.488±0.034   | 1.057±0.056  |
| <b>W-48h</b>            | 0.0214±0.003              | 5.3313±0.883 | 0.0309±0.004 | 17.569±1.619                  | 0.627±0.0372  | 1.075±0.067  |
| <b>Control SA</b>       | 0.011±0.003               | 1.4723±0.024 | 0.0916±0.003 | 11.198±0.803                  | 0.2534±0.009  | 0.292±0.011  |
| <b>SA-12h</b>           | 0.1637±0.022              | 3.304±0.254  | 0.3193±0.031 | 13.376±0.703                  | 0.505±0.022   | 1.526±0.046  |
| <b>SA-24h</b>           | 0.038±0.002               | 3.6474±0.451 | 0.185±0.016  | 16.402±0.817                  | 1.0565±2.761  | 2.762±0.107  |
| <b>SA-48h</b>           | 0.0075±0.001              | 1.425±0.313  | 0.1335±0.024 | 15.2103±0.406                 | 0.2091±0.0104 | 0.273±0.068  |
| <b>Control MeJ</b>      | 0.011±0.003               | 1.4723±0.024 | 0.0916±0.003 | 11.197±0.803                  | 0.247±0.010   | 0.298±0.021  |
| <b>MeJ-12h</b>          | 0.035±0.003               | 5.722±0.402  | 0.186±0.01   | 15.348±0.642                  | 0.439±0.374   | 1.821±0.127  |

---

|                |              |             |             |               |             |             |
|----------------|--------------|-------------|-------------|---------------|-------------|-------------|
| <b>MeJ-24h</b> | 0.075±0.004  | 8.507±0.637 | 0.622±0.033 | 17.086±0.321  | 0.291±0.028 | 0.588±0.026 |
| <b>MeJ-48h</b> | 0.0124±0.002 | 2.545±0.212 | 0.131±0.019 | 13.3102±0.556 | 0.581±0.021 | 2.165±0.216 |

---

\*\*\*Refer to the our earlier report (<http://dx.doi.org/10.1016/j.sajb.2014.07.012>)



**Supplemental Table S3:** Primers used in this study.

| <b>Name</b>                   | <b>Sequence</b>                                          | <b>Application</b>  |
|-------------------------------|----------------------------------------------------------|---------------------|
| <b>Degenerate primers</b>     |                                                          |                     |
| DegCHS1_F                     | 5'-TGACCACATGACCGACTTGA                                  | Core amplification  |
| DegCHS1_R                     | 5'-ACCATGGAGTCCAGGTGAGT                                  | Core amplification  |
| DegCHS2_F                     | 5'-TTGAAGGCCATCGAAGAGTG                                  | Core amplification  |
| DegCHS2_R                     | 5'-GTGAGCAATCCAGAAGAGTGA                                 | Core amplification  |
| <b>5' and 3' RACE primers</b> |                                                          |                     |
| GeneRacer RNA Oligo           | 5'-CGACUGGAGCACGAGGACACUGACAUGGACUGAAGGAGUAGAAA          | RACE programme      |
| GeneRacer Oligo dT            | 5'-GCTGTCAACGATACGCTACGTAACGGCATGACAGTG(T) <sub>24</sub> | RACE programme      |
| 5' RACE_OUT*                  | 5'-CGACTGGAGCACGAGGACACTGA                               | RACE programme      |
| 5' RACE_INN*                  | 5'-GGACACTGACATGGACTGAAGGAGTA                            | RACE programme      |
| 3' RACE_OUT*                  | 5'-GCTGTCAACGATACGCTACGTAACG                             | RACE programme      |
| 3' RACE_INN*                  | 5'-CGCTACGTAACGGCATGACAGTG                               | RACE programme      |
| 5' CHS1_OUT                   | 5'-TCTCAATCATCGACTTATCACACATGCG                          | RACE programme      |
| 5' CHS1_INN                   | 5'-TCCTTCAAGTCGGTCATGTGGTCA                              | RACE programme      |
| 3' CHS1_OUT                   | 5'-CCGACACTCACCTGGACTCCATGGTA                            | RACE programme      |
| 3' CHS1_INN                   | 5'-GAGCTCGAATTCACTGGCCGTCGTT                             | RACE programme      |
| 5' CHS2_OUT                   | 5'-ATGAAGCGCTTGACGGAAGGGCGCA                             | RACE programme      |
| 5' CHS2_INN                   | 5'-TCGACGCCCCGAGGTGGTGCACATGAT                           | RACE programme      |
| 3' CHS2_OUT                   | 5'-CTCCCCTCAATATTTACTGATTGGAAC                           | RACE programme      |
| 3' CHS2_INN                   | 5'-CTAAGAACATCCACAAGAGTCTTGCGG                           | RACE programme      |
| <b>Full-length primers</b>    |                                                          |                     |
| FulCHS1_F                     | 5'-ATGGCGCCAACCGTGCAGGAGAT                               | Full length cloning |
| FulCHS1_R                     | 5'-TCAATTGGCGGTGGGAACACTGTGGA                            | Full length cloning |
| FulCHS2_F                     | 5'-ATGGCACCGACGGTCCAGGAGAT                               | Full length cloning |

|                           |                                             |                     |
|---------------------------|---------------------------------------------|---------------------|
| FulCHS2_R                 | 5-CTAGTGAGCAACTGGTACACTGTGT                 | Full length cloning |
| <b>Expression primers</b> |                                             |                     |
| ExpCHS1_F                 | 5- <u>GGATCC</u> ATGGCGCCAACCGTGCAGGAGAT    | Expression analysis |
| ExpCHS1_R                 | 5-GAATTCCTCAATTGGCGGTGGGAACACTGTGGA         | Expression analysis |
| ExpCHS2_F                 | 5- <u>GGATCC</u> ATGGCACCGACGGTCCAGGAGAT    | Expression analysis |
| ExpCHS2_R                 | 5- <u>GAATTC</u> CCTAGTGAGCAACTGGTACACTGTGT | Expression analysis |
| <b>Real-Time primers</b>  |                                             |                     |
| Actin_F                   | 5-GAGAGTTTTGATGTCCCTGCCATG                  | Real-Time analysis  |
| Actin_R                   | 5-CAACGTCGCATTTTCATGATGGAGT                 | Real-Time analysis  |
| RtCHS1_F                  | 5-GACCACATGACCGACTTGAA                      | Real-Time analysis  |
| RtCHS1_R                  | 5-TCAGAAGATCCTCCGTCAGAT                     | Real-Time analysis  |
| RtCHS2_F                  | 5-GGCCCTCATCTCTAAGAACATC                    | Real-Time analysis  |
| RtCHS2_R                  | 5-CCTGAGCAATCCCAGAAGAG                      | Real-Time analysis  |
| <b>Promoter primers</b>   |                                             |                     |
| Walker-AP1*               | 5-GTAATACGACTCACTATAGGGC                    | Promoter analysis   |
| Walker-AP2*               | 5-ACTATAGGGCACGCGTGGT                       | Promoter analysis   |
| PmCHS1_OUT                | 5-TGTTGGTGACCCTGAAGTAGTAGTC                 | Promoter analysis   |
| PmCHS1_INN                | 5- CCGTGCCAATGGCCAGTTTTATTT                 | Promoter analysis   |
| PmCHS2_OUT                | 5- GGTAGTCCGCTTGGTAGATGCAGTTG               | Promoter analysis   |
| PmCHS2_INN                | 5- TCCGCCCTCTGCGCCTTCCTGATCT                | Promoter analysis   |

\*Primers provided with the kit # Start/stop codon's are italicized and enzyme sites are underlined

**Supplemental Table S4: Correlation of mRNA levels with flavonoid and anthraquinone content in different tissues of *Rheum emodi*.** Pearson correlation for the comparison of transcript levels and metabolite (total flavonoid and total anthraquinone) content was performed using GraphPad Prism 6 (GraphPad Software Inc., San Diego, CA, USA) to test the statistical significance of the relationship. \* indicates  $p < 0.1$ ; \*\* indicates  $p < 0.05$ ; and \*\*\* indicates  $p < 0.01$ .

|                    | <b>Variables</b>     | <b><i>ReCHS1</i></b> | <b><i>ReCHS2</i></b> | <b>Total flavonoids</b> | <b>Total anthraquinones</b> |
|--------------------|----------------------|----------------------|----------------------|-------------------------|-----------------------------|
| <b>Leaf tissue</b> | <i>ReCHS1</i>        | -                    | -0.64*               | 0.39**                  | -0.53*                      |
|                    | <i>ReCHS2</i>        | -0.64*               | -                    | -0.53*                  | 0.04                        |
|                    | Total flavonoids     | 0.39**               | -0.53*               | -                       | -0.34                       |
|                    | Total anthraquinones | -0.53*               | 0.04                 | -0.34                   | -                           |
| <b>Stem tissue</b> | <i>ReCHS1</i>        | -                    | 0.09                 | 0.41                    | -0.31*                      |
|                    | <i>ReCHS2</i>        | 0.09                 | -                    | -0.55*                  | 0.93**                      |
|                    | Total flavonoids     | 0.41                 | -0.55*               | -                       | 0.81*                       |
|                    | Total anthraquinones | -0.31*               | 0.93**               | 0.81*                   | -                           |
| <b>Root tissue</b> | <i>ReCHS1</i>        | -                    | 0.99***              | 0.60*                   | 0.36                        |
|                    | <i>ReCHS2</i>        | 0.99***              | -                    | -0.60*                  | 0.34                        |
|                    | Total flavonoids     | 0.60*                | -0.60*               | -                       | 0.51*                       |
|                    | Total anthraquinones | 0.36                 | 0.34                 | 0.51*                   | -                           |

**Supplemental Table S5: Correlation of mRNA levels with flavonoid and anthraquinone content in plant samples of *Rheum emodi* from different geographic locations (1600-4500 m asl).** Pearson correlation for the comparison of transcript levels and metabolite (total flavonoid and total anthraquinone) content was performed using GraphPad Prism 6 (GraphPad Software Inc., San Diego, CA, USA) to test the statistical significance of the relationship. \* indicates  $p < 0.1$ ; \*\* indicates  $p < 0.05$ ; and \*\*\* indicates  $p < 0.01$ .

|                               | Variables            | <i>ReCHS1</i> | <i>ReCHS2</i> | Total flavonoids | Total anthraquinones |
|-------------------------------|----------------------|---------------|---------------|------------------|----------------------|
| <b>Bonera,<br/>Pulwama</b>    | <i>ReCHS1</i>        | -             | 0.95**        | 0.58*            | 0.24                 |
|                               | <i>ReCHS2</i>        | 0.95**        | -             | -0.66**          | 0.40*                |
|                               | Total flavonoids     | 0.58*         | -0.66**       | -                | 0.32**               |
|                               | Total anthraquinones | 0.24          | 0.40*         | 0.32**           | -                    |
| <b>Yarikhah,<br/>Srinagar</b> | <i>ReCHS1</i>        | -             | -0.59***      | 0.71**           | 0.39                 |
|                               | <i>ReCHS2</i>        | -0.59***      | -             | -0.33            | 0.66**               |
|                               | Total flavonoids     | 0.71**        | -0.33         | -                | -0.89*               |
|                               | Total anthraquinones | 0.39          | 0.66**        | -0.89*           | -                    |
| <b>Pense La,<br/>Ladakh</b>   | <i>ReCHS1</i>        | -             | -0.26         | 0.47*            | 0.21                 |
|                               | <i>ReCHS2</i>        | -0.26         | -             | -0.09            | 0.49*                |
|                               | Total flavonoids     | 0.47*         | -0.09         | -                | -0.68**              |
|                               | Total anthraquinones | 0.21          | 0.49*         | -0.68**          | -                    |
| <b>Nyoma,<br/>Ladakh</b>      | <i>ReCHS1</i>        | -             | 0.89***       | 0.64**           | -0.36                |
|                               | <i>ReCHS2</i>        | 0.89***       | -             | -0.68**          | 0.30*                |
|                               | Total flavonoids     | 0.64**        | -0.68**       | -                | -0.73***             |
|                               | Total anthraquinones | -0.36         | 0.30*         | -0.73***         | -                    |

**Supplemental Table S6: Correlation of mRNA levels with flavonoid and anthraquinone content in MeJ treated plants of *Rheum emodi*.** Pearson correlation for the comparison of transcript levels and metabolite (total flavonoid and total anthraquinone) content was performed using GraphPad Prism 6 (GraphPad Software Inc., San Diego, CA, USA) to test the statistical significance of the relationship. \* indicates  $p < 0.1$ ; \*\* indicates  $p < 0.05$ ; and \*\*\* indicates  $p < 0.01$ .

|                    | Variables            | <i>ReCHS1</i> | <i>ReCHS2</i> | Total flavonoids | Total anthraquinones |
|--------------------|----------------------|---------------|---------------|------------------|----------------------|
| <b>MeJ control</b> | <i>ReCHS1</i>        | -             | -0.94**       | 0.25             | -0.34                |
|                    | <i>ReCHS2</i>        | -0.94**       | -             | 0.57*            | 0.44*                |
|                    | Total flavonoids     | 0.25          | 0.57*         | -                | 0.30                 |
|                    | Total anthraquinones | -0.34         | 0.44*         | 0.30             | -                    |
| <b>MeJ 12 h</b>    | <i>ReCHS1</i>        | -             | -0.03         | 0.48***          | -0.59*               |
|                    | <i>ReCHS2</i>        | -0.03         | -             | -0.89*           | 0.21**               |
|                    | Total flavonoids     | 0.48***       | -0.89*        | -                | 0.44*                |
|                    | Total anthraquinones | -0.59*        | 0.21**        | 0.44*            | -                    |
| <b>MeJ 24 h</b>    | <i>ReCHS1</i>        | -             | -0.83**       | 0.12             | -0.47*               |
|                    | <i>ReCHS2</i>        | -0.83**       | -             | 0.45*            | 0.38                 |
|                    | Total flavonoids     | 0.12          | 0.45*         | -                | -0.46*               |
|                    | Total anthraquinones | -0.47*        | 0.38          | -0.46*           | -                    |
| <b>MeJ 48 h</b>    | <i>ReCHS1</i>        | -             | 0.59*         | 0.36**           | -0.38                |
|                    | <i>ReCHS2</i>        | 0.59*         | -             | 0.52*            | 0.29                 |
|                    | Total flavonoids     | 0.36**        | 0.52*         | -                | -0.80***             |
|                    | Total anthraquinones | -0.38         | 0.29          | -0.80***         | -                    |



**Supplemental Table S7: Correlation of mRNA levels with flavonoid and anthraquinone content in SA treated plants of *Rheum emodi*.** Pearson correlation for the comparison of transcript levels and metabolite (total flavonoid and total anthraquinone) content was performed using GraphPad Prism 6 (GraphPad Software Inc., San Diego, CA, USA) to test the statistical significance of the relationship. \* indicates  $p < 0.1$ ; \*\* indicates  $p < 0.05$ ; and \*\*\* indicates  $p < 0.01$ .

|                   | Variables            | <i>ReCHS1</i> | <i>ReCHS2</i> | Total flavonoids | Total anthraquinones |
|-------------------|----------------------|---------------|---------------|------------------|----------------------|
| <b>SA control</b> | <i>ReCHS1</i>        | -             | 0.94**        | 0.50*            | -0.41                |
|                   | <i>ReCHS2</i>        | 0.94**        | -             | 0.55             | 0.34*                |
|                   | Total flavonoids     | 0.50*         | 0.55          | -                | 0.33                 |
|                   | Total anthraquinones | -0.41         | 0.34*         | 0.33             | -                    |
| <b>SA 12 h</b>    | <i>ReCHS1</i>        | -             | 0.95***       | 0.21             | -0.39                |
|                   | <i>ReCHS2</i>        | 0.95***       | -             | 0.23             | 0.39*                |
|                   | Total flavonoids     | 0.21          | 0.24          | -                | 0.91*                |
|                   | Total anthraquinones | -0.39         | 0.39*         | 0.91*            | -                    |
| <b>SA 24 h</b>    | <i>ReCHS1</i>        | -             | -0.94**       | 0.73*            | 0.63                 |
|                   | <i>ReCHS2</i>        | -0.94**       | -             | 0.30*            | 0.62**               |
|                   | Total flavonoids     | 0.73*         | 0.30*         | -                | 0.79*                |
|                   | Total anthraquinones | 0.63          | 0.62**        | 0.79*            | -                    |
| <b>SA 48 h</b>    | <i>ReCHS1</i>        | -             | -0.86*        | 0.61**           | 0.45*                |
|                   | <i>ReCHS2</i>        | -0.86*        | -             | -0.46***         | 0.39                 |
|                   | Total flavonoids     | 0.61**        | -0.46***      | -                | -0.92**              |
|                   | Total anthraquinones | 0.45*         | 0.39          | -0.92**          | -                    |

**Supplemental Table S8: Correlation of mRNA levels with flavonoid and anthraquinone content in UV treated plants of *Rheum emodi*.** Pearson correlation for the comparison of transcript levels and metabolite (total flavonoid and total anthraquinone) content was performed using GraphPad Prism 6 (GraphPad Software Inc., San Diego, CA, USA) to test the statistical significance of the relationship. \* indicates  $p < 0.1$ ; \*\* indicates  $p < 0.05$ ; and \*\*\* indicates  $p < 0.01$ .

|                   | Variables            | <i>ReCHS1</i> | <i>ReCHS2</i> | Total flavonoids | Total anthraquinones |
|-------------------|----------------------|---------------|---------------|------------------|----------------------|
| <b>UV control</b> | <i>ReCHS1</i>        | -             | 0.97**        | 0.65**           | 0.05                 |
|                   | <i>ReCHS2</i>        | 0.97**        | -             | 0.05             | 0.90*                |
|                   | Total flavonoids     | 0.65**        | 0.05          | -                | 0.15                 |
|                   | Total anthraquinones | 0.05          | 0.90*         | 0.15             | -                    |
| <b>UV 3 h</b>     | <i>ReCHS1</i>        | -             | 0.75*         | -0.30            | 0.40                 |
|                   | <i>ReCHS2</i>        | 0.75*         | -             | 0.40             | 0.74***              |
|                   | Total flavonoids     | -0.30         | 0.24          | -                | -0.66**              |
|                   | Total anthraquinones | 0.40          | 0.74***       | -0.66**          | -                    |
| <b>UV 6 h</b>     | <i>ReCHS1</i>        | -             | 0.59***       | 0.43**           | 0.56*                |
|                   | <i>ReCHS2</i>        | 0.59***       | -             | 0.56*            | 0.56**               |
|                   | Total flavonoids     | 0.43**        | -0.47*        | -                | -0.09                |
|                   | Total anthraquinones | 0.56*         | 0.56**        | -0.09            | -                    |
| <b>UV 9 h</b>     | <i>ReCHS1</i>        | -             | -0.95**       | 0.76***          | 0.34                 |
|                   | <i>ReCHS2</i>        | -0.95**       | -             | 0.53*            | -0.12                |
|                   | Total flavonoids     | 0.76***       | 0.53*         | -                | -0.45*               |
|                   | Total anthraquinones | 0.34          | -0.12         | -0.45*           | -                    |

**Supplemental Table S9: Correlation of mRNA levels with flavonoid and anthraquinone content in wounded plants of *Rheum emodi*.** Pearson correlation for the comparison of transcript levels and metabolite (total flavonoid and total anthraquinone) content was performed using GraphPad Prism 6 (GraphPad Software Inc., San Diego, CA, USA) to test the statistical significance of the relationship. \* indicates  $p < 0.1$ ; \*\* indicates  $p < 0.05$ ; and \*\*\* indicates  $p < 0.01$ .

|                      | Variables            | <i>ReCHS1</i> | <i>ReCHS2</i> | Total flavonoids | Total anthraquinones |
|----------------------|----------------------|---------------|---------------|------------------|----------------------|
| <b>Wound control</b> | <i>ReCHS1</i>        | -             | 0.55          | 0.07             | -0.33                |
|                      | <i>ReCHS2</i>        | 0.55          | -             | 0.45*            | 0.68**               |
|                      | Total flavonoids     | 0.07          | 0.45*         | -                | 0.94**               |
|                      | Total anthraquinones | -0.3          | 0.68**        | 0.94**           | -                    |
| <b>Wound 12 h</b>    | <i>ReCHS1</i>        | -             | 0.99***       | 0.41*            | -0.39**              |
|                      | <i>ReCHS2</i>        | 0.99***       | -             | 0.37             | 0.36*                |
|                      | Total flavonoids     | 0.41*         | 0.37          | -                | 0.89*                |
|                      | Total anthraquinones | -0.39**       | 0.36*         | 0.89*            | -                    |
| <b>Wound 24 h</b>    | <i>ReCHS1</i>        | -             | 0.99***       | 0.57*            | 0.39                 |
|                      | <i>ReCHS2</i>        | 0.99***       | -             | -0.34**          | 0.43***              |
|                      | Total flavonoids     | 0.57*         | -0.34**       | -                | 0.09                 |
|                      | Total anthraquinones | 0.39          | 0.43***       | 0.09             | -                    |
| <b>Wound 48 h</b>    | <i>ReCHS1</i>        | -             | -0.69***      | 0.41             | 0.22                 |
|                      | <i>ReCHS2</i>        | -0.69***      | -             | -0.46*           | 0.16                 |
|                      | Total flavonoids     | 0.41          | -0.46*        | -                | 0.79***              |
|                      | Total anthraquinones | 0.22          | 0.16          | 0.79***          | -                    |
